# Supplementary material for: Potential of Matrix Metalloproteinase Inhibitors for the Treatment of Local Tissue Damage Induced by a Type P-I Snake Venom Metalloproteinase
Source: MDPI journal article supplement (doi:10.3390/toxins12010008), 2019-12-20
Supplement: s1 [file s1]

# Supplementary Materials: Potential of Matrix Metalloproteinase Inhibitors for the Treatment of Local Tissue Damage Induced by a Type P-I Snake Venom Metalloproteinase

Lina María Preciado, Jaime Andrés Pereañez and Jeffrey Comer

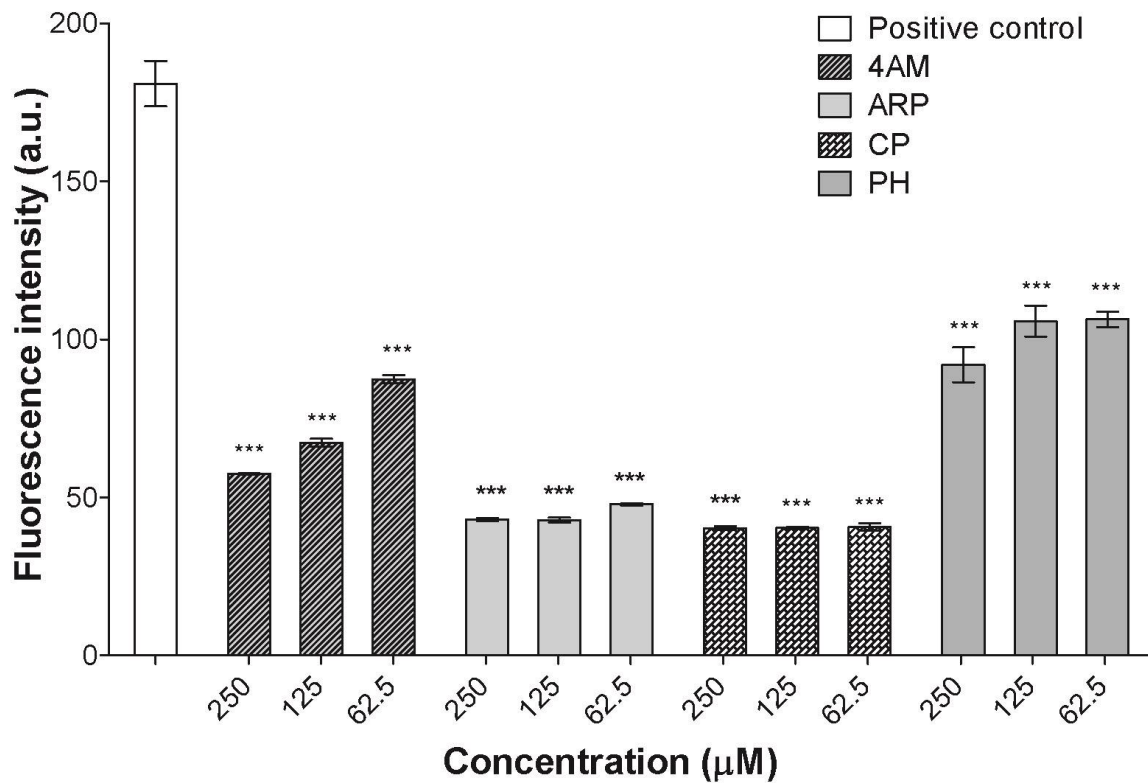

**Figure S1.** Fluorescence intensity in the experiment to measure the proteolytic activity of Batx-I in the presence of the inhibitors.

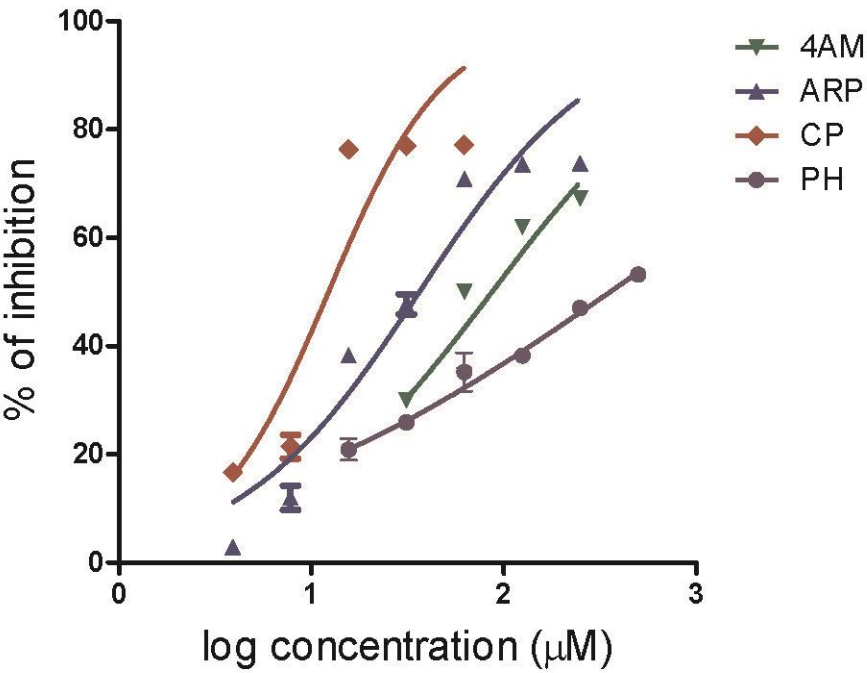

**Figure S2.** Inhibition of Batx-I proteolytic activity as a function of inhibitor concentration.
